# Supplementary material for: Beyond borders: an appraisal of the global congenital cardiac surgery workforce
Source: PubMed Central journal article supplement — Transl Pediatr. 2024 Jun 27;13(6):897–907. doi: 10.21037/tp-24-38 (PMC11228906; doi:10.21037/tp-24-38), 2024-06-27
Supplement: tp-13-06-897-dss.pdf [file tp-13-06-897-dss.pdf]

## Data Sharing Statement

|                     |                                                                                                                                                     |                                                                                                                                    |
|---------------------|-----------------------------------------------------------------------------------------------------------------------------------------------------|------------------------------------------------------------------------------------------------------------------------------------|
| <b>Article Info</b> | <a href="https://dx.doi.org/10.21037/tp-24-38">https://dx.doi.org/10.21037/tp-24-38</a>                                                             |                                                                                                                                    |
| <b>Item</b>         | <b>Question</b>                                                                                                                                     | <b>Authors' Response<br/>(place "-" if not applicable)</b>                                                                         |
| 1                   | Would you like to share data collected for your study to others?                                                                                    | Yes                                                                                                                                |
| 2                   | If not, would you like to share the reason for your decision?                                                                                       | -                                                                                                                                  |
| 3                   | What data in particular will be shared?                                                                                                             | Data collected from CTSNet on number of surgeons per country. Data collected from World Bank Database on burden of CHD per country |
| 4                   | Any other documents will be shared? Such as study protocol, statistical analysis plan, informed consent form, clinical study report, analytic code. | NA                                                                                                                                 |
| 5                   | When will data availability begin?                                                                                                                  | Date of publication                                                                                                                |
| 6                   | When will data availability end?                                                                                                                    | NA                                                                                                                                 |
| 7                   | To whom will you share the data?                                                                                                                    | Data on number of surgeons available per country will be made available for future studies                                         |
| 8                   | For what type of analysis or purpose?                                                                                                               | Future studies exploring the number of congenital cardiac surgeons per country                                                     |
| 9                   | How or where can the data/documents be obtained?                                                                                                    | Emails could be sent to the address below to obtain the shared data: jeevanfrancis15@gmail.com                                     |
| 10                  | Any other restrictions?                                                                                                                             | None                                                                                                                               |
